# Supplementary material for: Disseminated Endometriosis and Low-Grade Endometrioid Stromal Sarcoma in a Patient with a History of Uterine Morcellation for Adenomyosis
Source: PubMed Central journal article supplement (PMC7025032; doi:10.1155/2020/7201930), 2020-02-05
Supplement: 7201930.f1.pdf [file 7201930.f1.pdf]

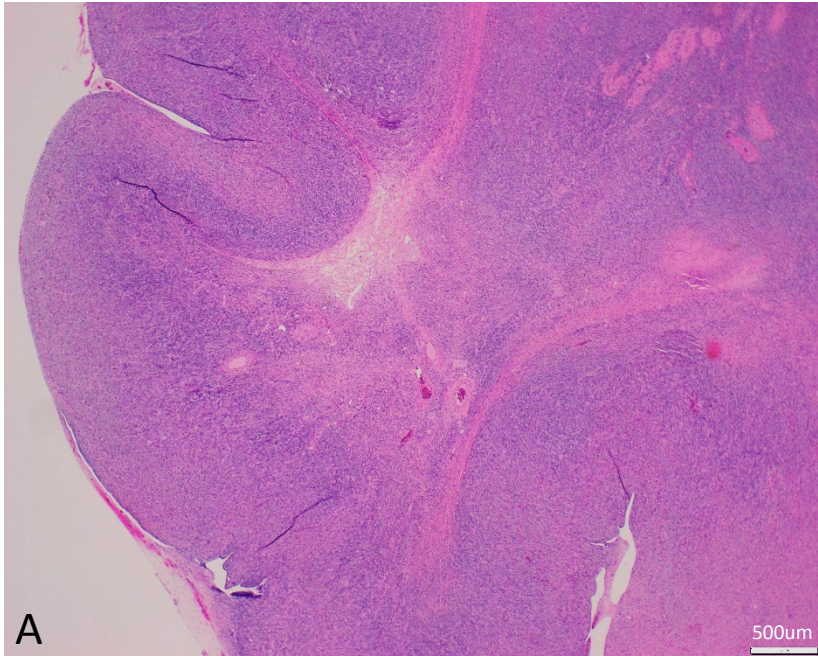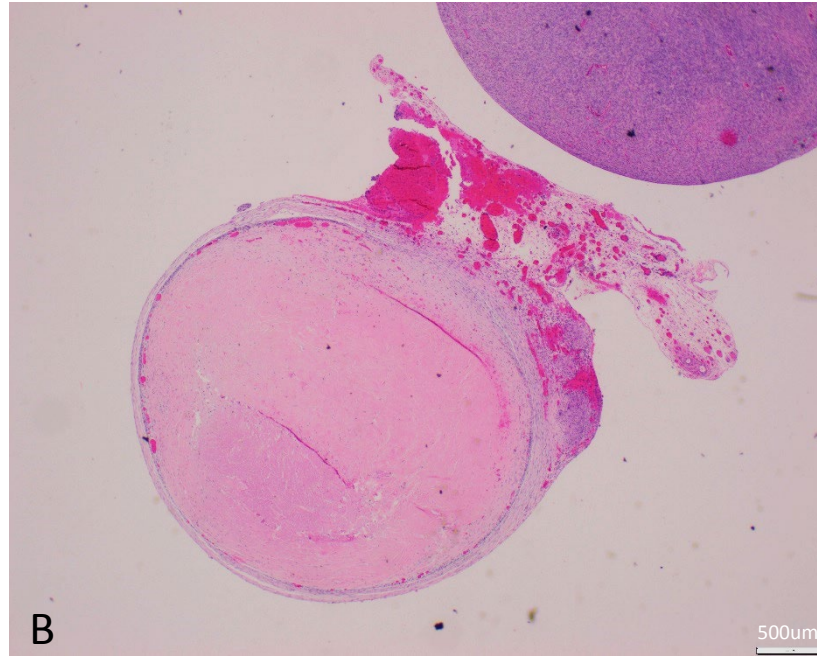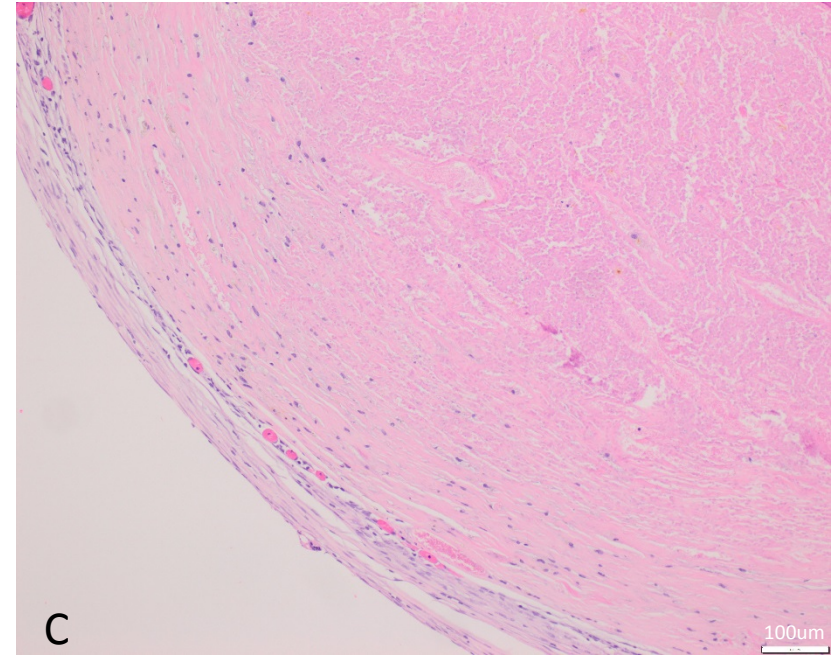

Supplemental Figure
